# Supplementary material
Source: PubMed Central journal article supplement (PMC3028708)
Supplement: supp_77_3_1101__1.pdf [file supp_77_3_1101__1.pdf]

TABLE S1. List of chitinase gene sequences extracted from the GOS data set and corresponding 16S rRNA gene sequences used for UniFrac analyses. Values for the average genome equivalents for sampling site GS001-GS047 were adopted from previous publications (Howard et al. 2008 (14); Biers et al. 2009 (3)). Values for the remaining sampling sites were estimated analogously by using the number of reads containing sequences for single copy genes from the respective samples. The fraction of bacteria containing chitinase genes was estimated by assuming 5 chitinase genes per cell (Cottrell et al. 1999 (7)).

| sampling site | chitinase-hits<br>(after removing<br>duplicate reads) | groupA | groupC | included<br>16S<br>reads | average<br>genome<br>equivalents | % chitin<br>degrader |
|---------------|-------------------------------------------------------|--------|--------|--------------------------|----------------------------------|----------------------|
| GS000a        | 60 (58)                                               | 56     | 4      | 10                       | 257                              | 4.5%                 |
| GS000b        | 6                                                     | 6      | 0      | 10                       | 245                              | 0.5%                 |
| GS000c        | 13                                                    | 13     | 0      | 10                       | 261                              | 1.0%                 |
| GS000d        | 9                                                     | 9      | 0      | 10                       | 229                              | 0.8%                 |
| GS001a*       | 2                                                     | 2      | 0      | 0                        | 27                               | 1.5%                 |
| GS001b*       | 1                                                     | 1      | 0      | 0                        | 25                               | 0.8%                 |
| GS001c        | 2                                                     | 2      | 0      | 4                        | 82                               | 0.5%                 |
| GS002         | 0                                                     | 0      | 0      | 0                        | 53                               | nd                   |
| GS003         | 3                                                     | 3      | 0      | 8                        | 28                               | 2.1%                 |
| GS004         | 0                                                     | 0      | 0      | 0                        | 28                               | nd                   |
| GS005         | 3                                                     | 3      | 0      | 8                        | 21                               | 2.8%                 |
| GS006         | 1                                                     | 1      | 0      | 4                        | 30                               | 0.7%                 |
| GS007         | 0                                                     | 0      | 0      | 0                        | 29                               | nd                   |
| GS008         | 2                                                     | 1      | 1      | 10                       | 75                               | 0.5%                 |
| GS009         | 2                                                     | 2      | 0      | 9                        | 40                               | 1.0%                 |
| GS010         | 0                                                     | 0      | 0      | 0                        | 53                               | nd                   |
| GS011         | 3                                                     | 3      | 0      | 10                       | 72                               | 0.8%                 |
| GS012         | 6                                                     | 6      | 0      | 10                       | 67                               | 1.8%                 |
| GS013         | 7                                                     | 6      | 1      | 10                       | 47                               | 3.0%                 |

|        |         |    |   |    |     |      |
|--------|---------|----|---|----|-----|------|
| GS014  | 1       | 1  | 0 | 10 | 81  | 0.2% |
| GS015  | 3       | 3  | 0 | 10 | 75  | 0.8% |
| GS016  | 2       | 2  | 0 | 10 | 73  | 0.5% |
| GS017  | 10      | 10 | 0 | 10 | 132 | 1.5% |
| GS018  | 4       | 4  | 0 | 10 | 86  | 0.9% |
| GS019  | 1       | 1  | 0 | 10 | 80  | 0.3% |
| GS020  | 21      | 20 | 1 | 30 | 135 | 3.1% |
| GS021  | 5 (4)   | 5  | 0 | 10 | 69  | 1.2% |
| GS022  | 3 (2)   | 3  | 0 | 10 | 74  | 0.5% |
| GS023  | 0       | 0  | 0 | 0  | 81  | nd   |
| GS025* | 4       | 4  | 0 | 0  | 20  | 4.1% |
| GS026  | 3       | 3  | 0 | 8  | 59  | 1.0% |
| GS027  | 4       | 4  | 0 | 10 | 135 | 0.6% |
| GS028  | 3       | 3  | 0 | 10 | 114 | 0.5% |
| GS029  | 6       | 6  | 0 | 10 | 79  | 1.5% |
| GS030  | 29 (21) | 29 | 0 | 10 | 265 | 1.6% |
| GS031  | 10      | 10 | 0 | 10 | 281 | 0.7% |
| GS032  | 5       | 5  | 0 | 10 | 67  | 1.5% |
| GS033  | 19 (18) | 19 | 0 | 30 | 286 | 1.3% |
| GS034  | 1       | 1  | 0 | 10 | 78  | 0.3% |
| GS035  | 3       | 3  | 0 | 10 | 84  | 0.7% |
| GS036  | 2       | 2  | 0 | 10 | 45  | 0.9% |
| GS037  | 0       | 0  | 0 | 0  | 39  | nd   |
| GS038  | 0       | 0  | 0 | 0  | <1  | nd   |
| GS039  | 0       | 0  | 0 | 0  | <1  | nd   |
| GS040  | 0       | 0  | 0 | 0  | <1  | nd   |
| GS041  | 0       | 0  | 0 | 0  | <1  | nd   |
| GS042  | 0       | 0  | 0 | 0  | <1  | nd   |
| GS043  | 0       | 0  | 0 | 0  | <1  | nd   |
| GS044  | 0       | 0  | 0 | 0  | <1  | nd   |
| GS045  | 0       | 0  | 0 | 0  | <1  | nd   |

|         |           |     |   |     |      |      |
|---------|-----------|-----|---|-----|------|------|
| GS046   | 0         | 0   | 0 | 0   | <1   | nd   |
| GS047   | 2         | 2   | 0 | 8   | 41   | 1.0% |
| GS048a  | 1         | 1   | 0 | 7   | 42   | 0.5% |
| GS049   | 0         | 0   | 0 | 0   | 56   | nd   |
| GS050   | 1         | 1   | 0 | 1   | <1   | nd   |
| GS051   | 0         | 0   | 0 | 0   | 63   | nd   |
| GS108a  | 0         | 0   | 0 | 0   | 23   | nd   |
| GS108b* | 2         | 2   | 0 | 0   | 16   | 2.5% |
| GS109   | 0         | 0   | 0 | 0   | 36   | nd   |
| GS110a  | 2         | 2   | 0 | 10  | 46   | 0.9% |
| GS110b* | 1         | 1   | 0 | 0   | 12   | 1.7% |
| GS111   | 0         | 0   | 0 | 0   | 32   | nd   |
| GS112a  | 1         | 1   | 0 | 10  | 48   | 0.4% |
| GS112b* | 1         | 1   | 0 | 0   | 12   | 1.6% |
| GS113   | 0         | 0   | 0 | 0   | 63   | nd   |
| GS114   | 2         | 2   | 0 | 10  | 171  | 0.2% |
| GS115   | 0         | 0   | 0 | 0   | 33   | nd   |
| GS116   | 1         | 1   | 0 | 6   | 33   | 0.6% |
| GS117a  | 5         | 5   | 0 | 10  | 175  | 0.6% |
| GS117b* | 0         | 0   | 0 | 0   | 16   | nd   |
| GS119   | 0         | 0   | 0 | 0   | 35   | nd   |
| GS120   | 0         | 0   | 0 | 0   | 24   | nd   |
| GS121   | 2         | 2   | 0 | 10  | 65   | 0.6% |
| GS122a  | 2         | 2   | 0 | 10  | 52   | 0.8% |
| GS122b* | 3         | 3   | 0 | 0   | 10   | 5.8% |
| GS123   | 1         | 1   | 0 | 10  | 61   | 0.3% |
| GS148   | 7         | 7   | 0 | 9   | 58   | 2.4% |
| GS149   | 4         | 4   | 0 | 10  | 63   | 1.3% |
| total   | 297 (284) | 290 | 7 | 468 | 4277 | 1.3% |

\* derived from particle size fractions >0.8 and therefore not included into UniFrac analyses. nd: not detected

TABLE S2. Sampling sites categories and environmental data for individual sampling sites from the GOS metagenome (Rusch et al. 2007 (32)).

Latitude classification was defined by allocating sampling sites with a latitude  $< 23.5^\circ$  to the tropic climate zone. The remaining sampling sites were grouped into a non tropic climate zone.

| Sampling site | Habitat Type  | Salinity habitat | Latitude habitat | Geographic Location habitat | Latitude   | Wat. Dep. [m] | Chlorophyll [ $\mu\text{gL}^{-1}$ ] | Salinity [psu] | Temp [ $^\circ\text{C}$ ] | Coll. Date |
|---------------|---------------|------------------|------------------|-----------------------------|------------|---------------|-------------------------------------|----------------|---------------------------|------------|
| GS000         | Open Ocean    | marine           | non Tropics      | Sargasso Sea                | 31°10'30N" | 4200          | 0.17                                | 36.7           | 20.5                      | 2/25/2003  |
| GS001         | Open Ocean    | marine           | non Tropics      | Sargasso Sea                | 32°10'00N" | 4200          | 0.1                                 | 36.7           | 22.9                      | 5/15/2003  |
| GS003         | Coastal       | marine           | non Tropics      | North American East Coast   | 42°51'10N" | 119           | 1.4                                 | 29.9           | 11.7                      | 8/21/2003  |
| GS005         | Embayment     | marine           | non Tropics      | North American East Coast   | 44°41'25N" | 64            | 6                                   | 30.2           | 15                        | 8/23/2003  |
| GS006         | Estuary       | estuarine        | non Tropics      | North American East Coast   | 45°6'42N"  | 11            | 2.8                                 | NA             | 11.2                      | 8/23/2003  |
| GS008         | Coastal       | marine           | non Tropics      | North American East Coast   | 41°29'9N"  | 12            | 2.2                                 | 26.5           | 9.4                       | 11/17/2003 |
| GS009         | Coastal       | marine           | non Tropics      | North American East Coast   | 41°5'28N"  | 32            | 4                                   | 31             | 11                        | 11/17/2003 |
| GS011         | Estuary       | estuarine        | non Tropics      | North American East Coast   | 38°56'24N" | 8             | 4.8                                 | NA             | 11                        | 11/18/2003 |
| GS012         | Estuary       | estuarine        | non Tropics      | North American East Coast   | 39°25'4N"  | 25            | 21                                  | 3.5            | 1                         | 12/18/2003 |
| GS013         | Coastal       | marine           | non Tropics      | North American East Coast   | 38°56'49N" | 20            | 3                                   | NA             | 9.3                       | 12/19/2003 |
| GS014         | Coastal       | marine           | non Tropics      | North American East Coast   | 36°0'14N"  | 31            | 1.7                                 | NA             | 18.6                      | 12/21/2003 |
| GS015         | Coastal       | marine           | non Tropics      | Caribbean Sea               | 32°30'25N" | 47            | 0.2                                 | 36             | 25                        | 1/8/2004   |
| GS016         | Coastal Sea   | marine           | non Tropics      | Caribbean Sea               | 24°29'18N" | 3333          | 0.16                                | 35.8           | 26.4                      | 1/8/2004   |
| GS017         | Open Ocean    | marine           | Tropics          | Caribbean Sea               | 24°10'29N" | 4513          | 0.13                                | 35.8           | 27                        | 1/9/2004   |
| GS018         | Open Ocean    | marine           | Tropics          | Caribbean Sea               | 20°31'21N" | 4470          | 0.14                                | 35.4           | 27.4                      | 1/10/2004  |
| GS019         | Coastal       | marine           | Tropics          | Caribbean Sea               | 18°2'12N"  | 3336          | 0.23                                | 35.4           | 27.7                      | 1/12/2004  |
| GS020         | Fresh Water   | freshwater       | Tropics          | Panama Canal                | 10°42'59N" | 4.2           | NA                                  | 0.1            | 28.6                      | 1/15/2004  |
| GS021         | Coastal       | marine           | Tropics          | Eastern Tropical Pacific    | 9°9'52N"   | 76            | 0.5                                 | 30.7           | 27.6                      | 1/20/2004  |
| GS022         | Open Ocean    | marine           | Tropics          | Eastern Tropical Pacific    | 8°7'45N"   | 2431          | 0.33                                | 32.3           | 29.3                      | 1/21/2004  |
| GS025         | Fringing Reef | marine           | Tropics          | Eastern Tropical Pacific    | 6°29'34N"  | 30            | 0.11                                | 31.4           | 28.3                      | 1/28/2004  |
| GS026         | Open Ocean    | marine           | Tropics          | Galapagos Islands           | 5°33'10N"  | 2386          | 0.22                                | 32.6           | 27.8                      | 2/2/2004   |
| GS027         | Coastal       | marine           | Tropics          | Galapagos Islands           | 1°15'51N"  | 2.3           | 0.4                                 | 34.9           | 25.5                      | 2/4/2004   |
| GS028         | Coastal       | marine           | Tropics          | Galapagos Islands           | 1°12'58S"  | 156           | 0.35                                | NA             | NA                        | 2/5/2004   |
| GS029         | Coastal       | marine           | Tropics          | Galapagos Islands           | 1°13'1S"   | 12            | 0.4                                 | 34.5           | 26.2                      | 2/9/2004   |

|        |                   |             |             |                        |            |      |       |      |      |           |
|--------|-------------------|-------------|-------------|------------------------|------------|------|-------|------|------|-----------|
| GS030  | Warm Seep         | marine      | Tropics     | Galapagos Islands      | 0°12'0S"   | 19   | NA    | NA   | 26.9 | 2/9/2004  |
| GS031  | Coastal upwelling | marine      | Tropics     | Galapagos Islands      | 0°16'20N"  | 19.6 | 0.35  | NA   | 18.6 | 2/10/2004 |
| GS032  | Mangrove          | estuarine   | Tropics     | Galapagos Islands      | 0°18'4S"   | 1.6  | NA    | NA   | 25.4 | 2/11/2004 |
| GS033  | Hypersaline       | hypersaline | Tropics     | Galapagos Islands      | 0°35'38S"  | 0.3  | NA    | 63.4 | 37.6 | 2/19/2004 |
| GS034  | Coastal           | marine      | Tropics     | Galapagos Islands      | 1°13'42S"  | 35   | 0.36  | NA   | 27.5 | 2/20/2004 |
| GS035  | Coastal           | marine      | Tropics     | Galapagos Islands      | 0°22'59S"  | 71   | 0.28  | 34.5 | 21.8 | 3/2/2004  |
| GS036  | Coastal           | marine      | Tropics     | Galapagos Islands      | 1°23'21N"  | 67   | 0.65  | 34.6 | 25.8 | 3/2/2004  |
| GS047  | Open Ocean        | marine      | Tropics     | Tropical South Pacific | 0°1'15S"   | 2400 | NA    | 37.3 | 28.6 | 3/29/2004 |
| GS048  | Coral Reef        | marine      | Tropics     | Polynesia Archipelagos | 10°7'53S"  | 34   | 0.095 | 35.1 | 28.9 | 5/18/2004 |
| GS050  | Coral Atoll       | marine      | Tropics     | Polynesia Archipelagos | 17°28'33S" | 24   | NA    | NA   | 27.8 | 5/19/2004 |
| GS108  | Lagoon Reef       | marine      | Tropics     | Indian Ocean           | 15°16'40S" | 7    | 0.108 | 32.4 | 25.8 | 8/4/2005  |
| GS110  | Open Ocean        | marine      | Tropics     | Indian Ocean           | 12°5'33S"  | 1220 | 0.128 | 32.7 | 27   | 8/6/2005  |
| GS112a | Open Ocean        | marine      | Tropics     | Indian Ocean           | 10°26'46S" | 4573 | 0.134 | 32.5 | 26.6 | 8/8/2005  |
| GS114  | Open Ocean        | marine      | Tropics     | Indian Ocean           | 8°30'18S"  | 3649 | 0.14  | 33.1 | 28.2 | 8/15/2005 |
| GS116  | Open Ocean        | marine      | Tropics     | Indian Ocean           | 8°30'18S"  | 2150 | 0.287 | 33.1 | 26.2 | 8/17/2005 |
| GS117a | Coastal           | marine      | Tropics     | Indian Ocean           | 4°59'25S"  | 14   | 0.206 | 35.5 | 26.4 | 9/9/2005  |
| GS121  | Open Ocean        | marine      | non Tropics | Indian Ocean           | 4°38'6S"   | 4309 | 0.14  | 35.4 | 23.1 | 9/29/2005 |
| GS122  | Open Ocean        | marine      | non Tropics | Indian Ocean           | 4°36'49S"  | 4921 | 0.151 | 35.8 | 20.2 | 9/30/2005 |
| GS123  | Open Ocean        | marine      | non Tropics | Indian Ocean           | 29°20'56S" | 1860 | 0.228 | 35.8 | 20.4 | 10/1/2005 |
| GS148  | Fringing Reef     | marine      | Tropics     | Indian Ocean           | 30°53'54S" | 1    | NA    | NA   | NA   | 9/11/2005 |
| GS149  | Harbor            | marine      | Tropics     | Indian Ocean           | 32°23'57S" | 5    | NA    | NA   | NA   | 9/12/2005 |

NA: not available

TABLE S3. RDP Classification of 16S rRNA genes extracted from the GOS database and used for UniFrac analyses.

| bacterial class       | number of sequences | percent |
|-----------------------|---------------------|---------|
| Spirochaetes          | 1                   | 0.2%    |
| Mollicutes            | 1                   | 0.2%    |
| Nitrospira            | 1                   | 0.2%    |
| Deferribacteres       | 1                   | 0.2%    |
| Ktedonobacteria       | 1                   | 0.2%    |
| WS3                   | 1                   | 0.2%    |
| Epsilonproteobacteria | 2                   | 0.4%    |
| Deinococci            | 2                   | 0.4%    |
| Clostridia            | 3                   | 0.6%    |
| Holophaga             | 5                   | 1.1%    |
| Opitute               | 5                   | 1.1%    |
| Betaproteobacteria    | 12                  | 2.6%    |
| Deltaproteobacteria   | 15                  | 3.2%    |
| Gammaproteobacteria   | 19                  | 4.1%    |
| Sphingobacteria       | 28                  | 6.0%    |
| Actinobacteria        | 54                  | 11.5%   |
| Cyanobacteria         | 69                  | 14.7%   |
| Flavobacteria         | 93                  | 19.9%   |
| Alphaproteobacteria   | 149                 | 31.8%   |

## References

- Biers, E. J., S. L. Sun, et al. (2009). "Prokaryotic genomes and diversity in surface ocean waters:interrogating the Global Ocean Sampling metagenome." Applied and Environmental Microbiology **75**(7): 2221-2229.
- Cottrell, M. T., J. A. Moore, et al. (1999). "Chitinases from uncultured marine microorganisms." Applied and Environmental Microbiology **65**(6): 2553-2557.
- Howard, E. C., S. L. Sun, et al. (2008). "Abundant and diverse bacteria involved in DMSP degradation in marine surface waters." Environmental Microbiology **10**(9): 2397-2410.
- Rusch, D. B., A. L. Halpern, et al. (2007). "The Sorcerer II Global Ocean Sampling Expedition: Northwest Atlantic through Eastern Tropical Pacific." PLoS Biol **5**(3): e77.
