# Supplementary material
Source: PubMed Central journal article supplement (PMC3028708)
Supplement: supp_77_3_1101__2.pdf [file supp_77_3_1101__2.pdf]

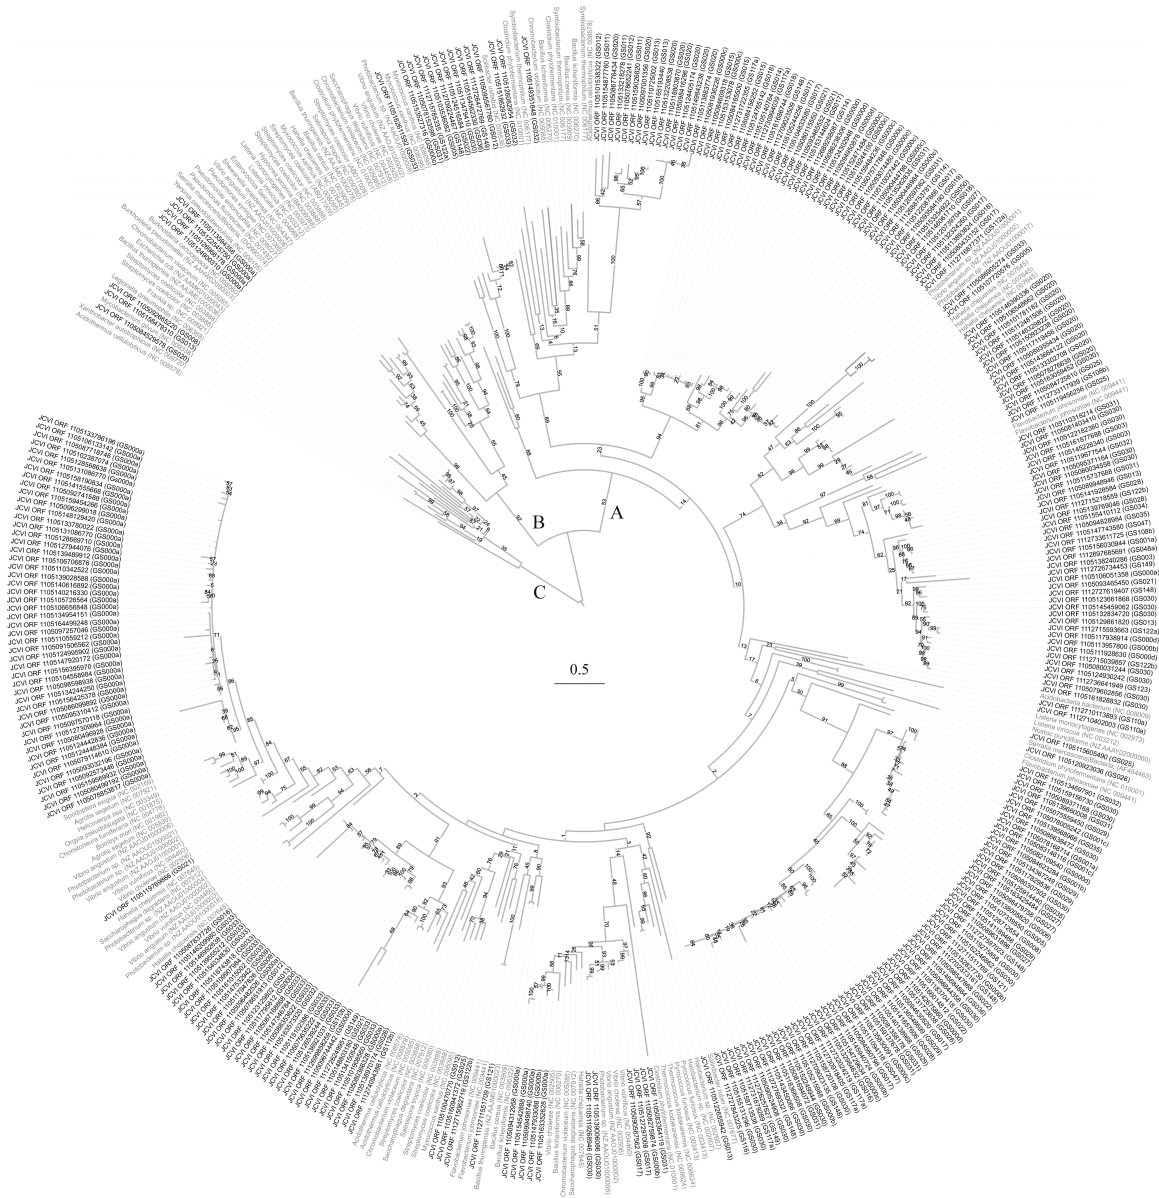

FIG. S1. Maximum Likelihood tree with bootstrap values containing putative chitinase genes (GH18) retrieved from the GOS database and chitinase genes from cultured reference organisms. Letters at the main branches denote the major chitinase groups. GOS sample ID is indicated in brackets behind the extracted chitinase genes and genbank accession is indicated in brackets behind the reference chitinase genes.
